# Supplementary material for: A portable and miniaturized lab-on-fiber sensor based on a responsive Fabry–Perot resonance cavity for the detection of thiocyanate
Source: Royal Society of Chemistry journal article supplement (doi:10.1039/d2ay01110g), 2022-01-01
Supplement: d2ay01110g1.pdf [file d2ay01110g1.pdf]

## Electronic Supplementary Information

### Portable and miniaturized lab-on-fiber sensor based on responsive Fabry-Perot resonance cavity for the detection of thiocyanate

Guangrong Wang,<sup>a</sup> Zhixin Lv,<sup>a</sup> Chengyang wang,<sup>\*b</sup> Dan Chen,<sup>a</sup> Xuemin Zhang,<sup>a</sup> Liying Zhang,<sup>a</sup> Fuqiang Fan,<sup>a</sup> Yu Fu<sup>a</sup> and Tieqiang Wang<sup>\*a</sup>

<sup>a</sup> College of Science, Northeastern University, Shenyang 110819, P. R. China

<sup>b</sup> College of Chemistry, Jilin University, Changchun 130012, P. R. China

\*Corresponding Author: E-mail: wangtieqiang@mail.neu.edu.cn and chengyangw19@mails.jlu.edu.cn

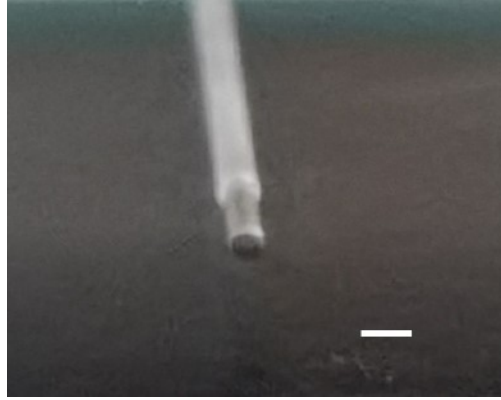

**Fig. S1.** The photograph of the fabricated MIM LOF sensor (the bar is 1 mm).

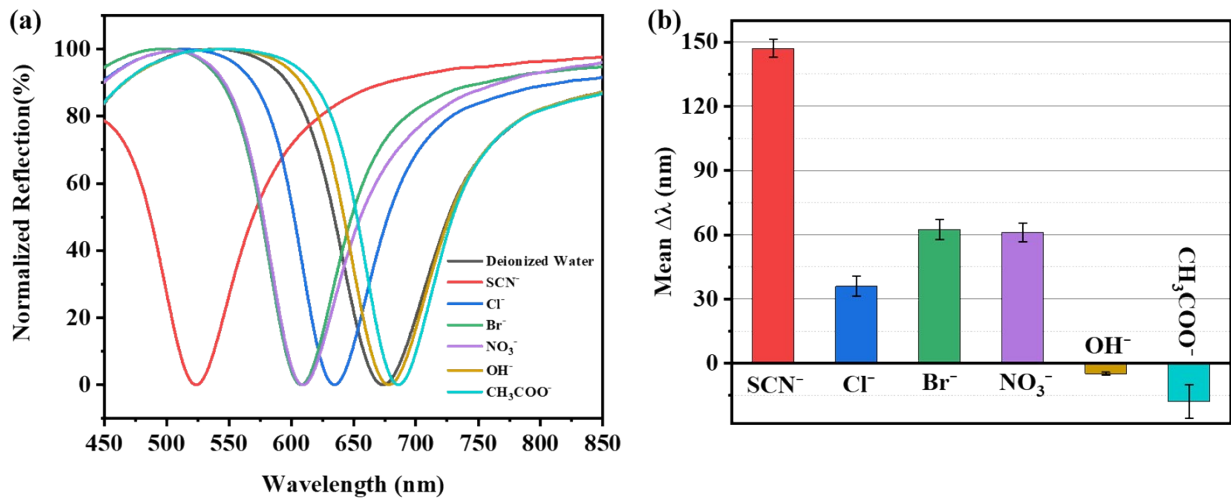

**Fig. S2.** (a) Normalized reflection spectra of the fabricated LOF sensor in different anions. (b) The reflection dip shift of the fabricated LOF sensor in different anions.

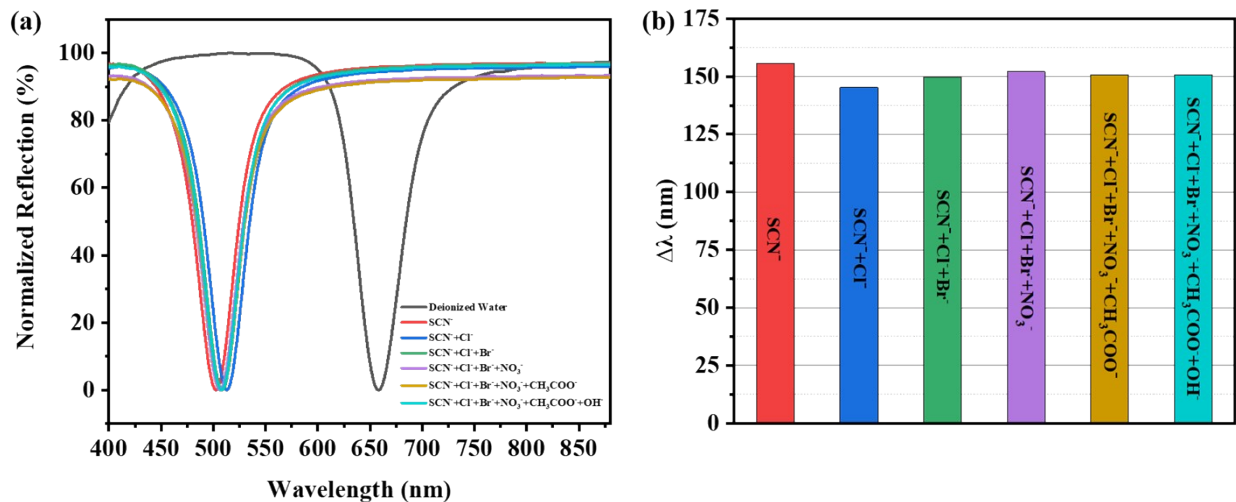

**Fig. S3.** (a) Normalized reflection spectra of the fabricated LOF sensor in deionized water,  $\text{SCN}^-$  solution and mixed solution of  $\text{SCN}^-$  and multiple interfering anions. (b) The reflection dip shift of the fabricated LOF sensor in  $\text{SCN}^-$  solution and mixed solution of  $\text{SCN}^-$  and multiple interfering anions.

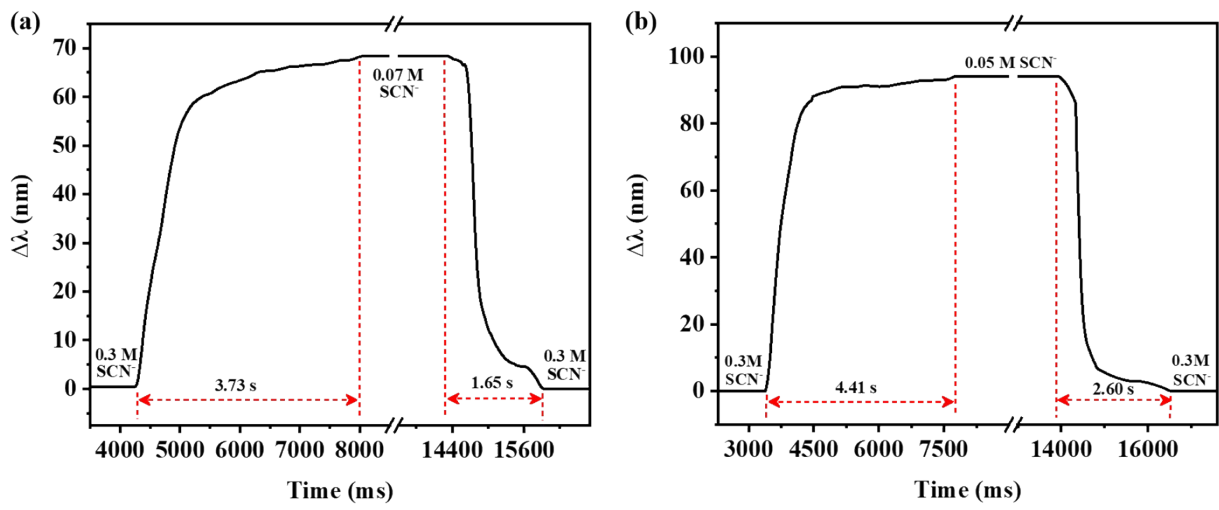

**Fig. S4.** The time-dependent wavelength of reflection dip shift of the fabricated LOF sensor in SCN<sup>-</sup> solution with different concentration ranges: (a) 0.3 to 0.07 M; (b) 0.3 to 0.05 M.
